# Supplementary material for: Non-myeloma light chain cast nephropathy: a multicenter retrospective study on clinicopathological characteristics
Source: PubMed Central journal article supplement — Haematologica. 2024 Mar 28;109(8):2721–5. doi: 10.3324/haematol.2024.285031 (PMC11290539; doi:10.3324/haematol.2024.285031), 2024-03-28
Supplement: 2024_285031_MARTINS_SUPPL.pdf [file 2024_285031_MARTINS_SUPPL.pdf]

# Non-myeloma light chain cast nephropathy: a multicenter retrospective study on clinicopathological characteristics

## Authors

---

Ana Cristina Martins,<sup>1,2</sup> Jean-Baptiste Gibier,<sup>3</sup> Charles Ronsin,<sup>4</sup> Christine Kandel-Aznar,<sup>5</sup> Anne Moreau,<sup>5,6</sup> Marion Chapal,<sup>7</sup> Diogo Francisco,<sup>1,2</sup> Hamza Sakhi,<sup>8,9</sup> Julie Oniszczyk,<sup>10</sup> Lorraine Gueguen,<sup>11</sup> Anne Grunenwald,<sup>12</sup> Mathilde Devaux,<sup>13</sup> Alexandre Karras,<sup>9,14</sup> Virginie Royal,<sup>15</sup> Marion Rabant,<sup>1,9</sup> Viviane Gnemmi,<sup>3</sup> Jérôme Olagne,<sup>16,17#</sup> Jean-Paul Duong Van Huyen<sup>1,9#</sup> and Pierre Isnard<sup>1,9#</sup>

<sup>1</sup>Department of Pathology, Necker-Enfants Malades and Robert Debré University Hospital, APHP, Paris, France; <sup>2</sup>Nephrology and Kidney Transplantation Department, Centro Hospitalar de Lisboa Ocidental, Lisbon, Portugal; <sup>3</sup>Department of Pathology, Lille University Hospital, Lille, France; <sup>4</sup>Department of Nephrology, Nantes University Hospital, Nantes, France; <sup>5</sup>Department of Pathology, Nantes University Hospital, Nantes, France; <sup>6</sup>Department of Pathology, Centre Hospitalier Départemental de Vendée, La Roche sur Yon, France; <sup>7</sup>Department of Nephrology, Centre Hospitalier Départemental de Vendée, La Roche sur Yon, France; <sup>8</sup>Department

of Nephrology, Necker University Hospital, Paris, France; <sup>9</sup>Paris-Cité University, Paris, France; <sup>10</sup>Department of Nephrology, Foch Hospital, Suresnes, France; <sup>11</sup>Department of Nephrology, Ta'aone Hospital, Tahiti, French Polynesia; <sup>12</sup>Department of Nephrology, Poissy Hospital, Poissy, France; <sup>13</sup>Department of Internal Medicine, Poissy Hospital, Poissy, France; <sup>14</sup>Department of Nephrology, Georges Pompidou European University Hospital, Paris, France; <sup>15</sup>Department of Pathology, Maisonneuve-Rosemont Hospital, Montréal University, Montréal, Quebec, Canada; <sup>16</sup>Department of Nephrology and Transplantation, Strasbourg University Hospital, Strasbourg, France and <sup>17</sup>Department of Pathology, Strasbourg University Hospital, Strasbourg, France

*#JO, J-PDVH and PI contributed equally as senior authors.*

Correspondence:  
P. ISNARD E - pierre.isnard@aphp.fr

<https://doi.org/10.3324/haematol.2024.285031>

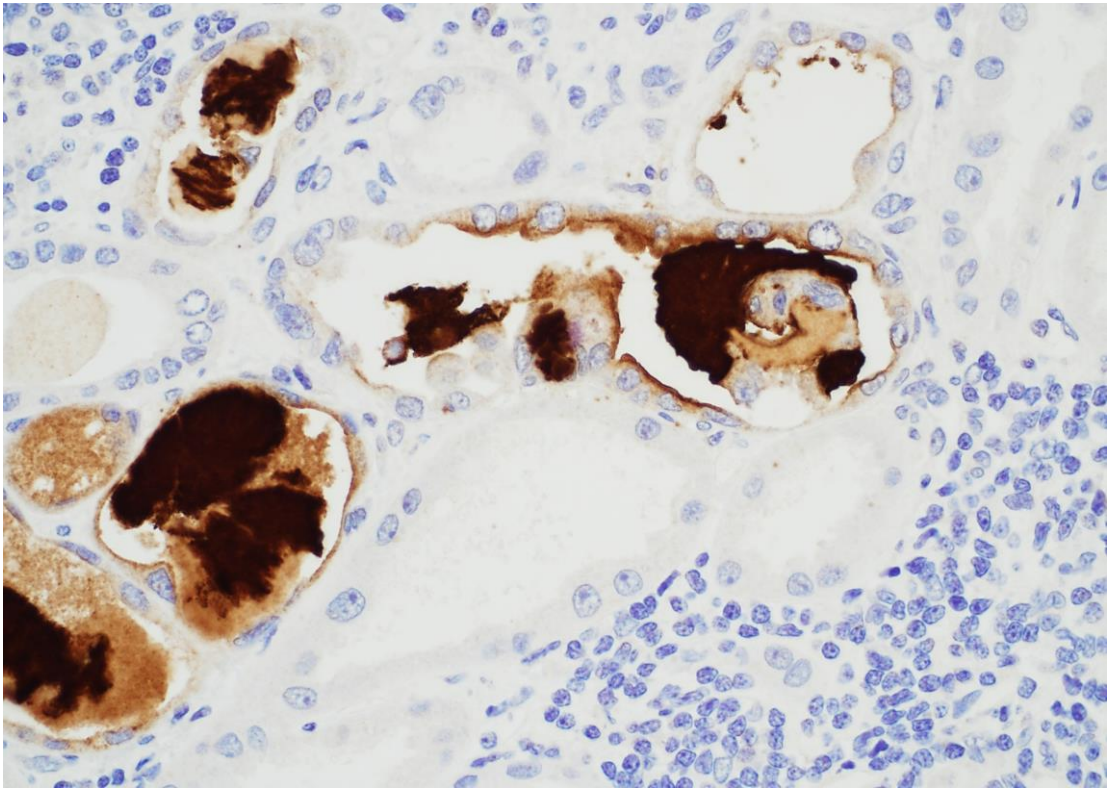

**Supplementary Figure 1: Immunohistochemistry of uromodulin**

Representative image of immunohistochemistry targeting uromodulin showing its association to casts identified in the lumen of tubular sections.
